# Supplementary material
Source: PubMed Central journal article supplement (PMC8077440)
Supplement: joces-134-251967-s1.pdf [file joces-134-251967-s1.pdf]

SUPPLEMENTAL MATERIALS

**Table S1: *Alternatively spliced variants of Cdc42 mRNA are found from fish to mammals.*** Sequence comparison for indicated species shows conservation of *Cdc42* alternative splicing from fish to primates.

| Species (common name)                         | NCBI Accession #<br><i>prenyl-Cdc42</i> | NCBI Accession #<br><i>palm-Cdc42</i> | CaaX motif<br><i>prenyl-Cdc42</i> | CCaX motif<br><i>palm-Cdc42</i> |
|-----------------------------------------------|-----------------------------------------|---------------------------------------|-----------------------------------|---------------------------------|
| <i>Saccharomyces cerevisiae</i> (yeast)       | NM_001182116.1                          | -                                     | CAIL                              | -                               |
| <i>Caenorhabditis elegans</i> (worm)          | NM_063197.7                             | -                                     | CNIL                              | -                               |
| <i>Saccoglossus kowalevskii</i> (worm)        | NM_001168041.1                          | -                                     | CVLL                              | -                               |
| <i>Acanthaster planci</i> (star fish)         | XM_022244898.1                          | -                                     | CSLL                              | -                               |
| <i>Danio rerio</i> (zebra fish)               | NM_200632.2                             | NM_001018120.2                        | CVLL                              | CCIF                            |
| <i>Xenopus tropicalis</i> (frog)              | NM_001017070.3                          | NM_001008026.1                        | CRLl                              | CCIF                            |
| <i>Xenopus laevis</i> (frog)                  | NM_001085899.1                          | XM_018224258.1                        | CMLL                              | CCIF                            |
| <i>Nanorana parkeri</i> (frog)                | XM_018568983.1                          | XM_018568984.1                        | CRLl                              | CCIF                            |
| <i>Callorhinchus milii</i> (shark)            | XM_007897764.1                          | XM_007897763.1                        | CVLL                              | CCIF                            |
| <i>Python bivittatus</i> (snake)              | XM_015889191.1                          | XM_015889192.1                        | CVLL                              | CCIF                            |
| <i>Alligator mississippiensis</i> (alligator) | XM_014597185.2                          | XM_014597186.2                        | CVLL                              | CCIF                            |
| <i>Gallus gallus</i> (chicken)                | NM_205048.1                             | XM_015296827.1                        | CVLL                              | CCIF                            |
| <i>Chelonia mydas</i> (turtle)                | XM_007065922.1                          | XM_007065923.1                        | CVLL                              | CCIF                            |
| <i>Mus musculus</i> (mouse)                   | NM_009861.3                             | NM_001243769.1                        | CVLL                              | CCIF                            |
| <i>Homo sapiens</i> (human)                   | NM_001039802.1                          | NM_044472.2                           | CVLL                              | CCIF                            |

**Table S2: Normalized counts for prenyl-Cdc42 and palm-Cdc42 mRNAs from subcellular transcriptome datasets of different neuron types.** Raw data of published and unpublished subcellular transcriptome datasets were performed by RNA-seq analysis pipeline (STAR, HTSeq and EdgeR) to obtain the normalized counts. Datasets were from cell body and axon-enriched transcriptomes of: embryonic DRG neurons (Minis et al., 2014), embryonic motor neurons (Briese et al., 2016), adult DRG neurons (unpublished data), and cell body-/neurite-enriched transcriptome of embryonic cortical neurons (Taliaferro et al., 2016).

| Neuron (species)           | Cell Body Compartment (FKPM ± SEM) |              | Axon/Neurite Compartment (FKPM ± SEM) |              |
|----------------------------|------------------------------------|--------------|---------------------------------------|--------------|
|                            | Palm-Cdc42                         | Prenyl-Cdc42 | Palm-Cdc42                            | Prenyl-Cdc42 |
| Embryonic DRG (mouse)      | 109.3 ± 23.9                       | 271.2 ± 16.1 | 47.6 ± 2.3                            | 384.7 ± 6.1  |
| Embryonic motor (mouse)    | 105.2 ± 10.0                       | 191.4 ± 14.4 | 18.0 ± 5.6                            | 96.7 ± 40.0  |
| Adult DRG (mouse)          | 13.0 ± 1.8                         | 67.8 ± 6.6   | 4.7 ± 2.1                             | 46.6 ± 19.3  |
| Embryonic cortical (mouse) | 428.1 ± 145.9                      | 945.6 ± 7.3  | 343.6 ± 62.7                          | 908.0 ± 44.8 |

Supplemental Figure S1

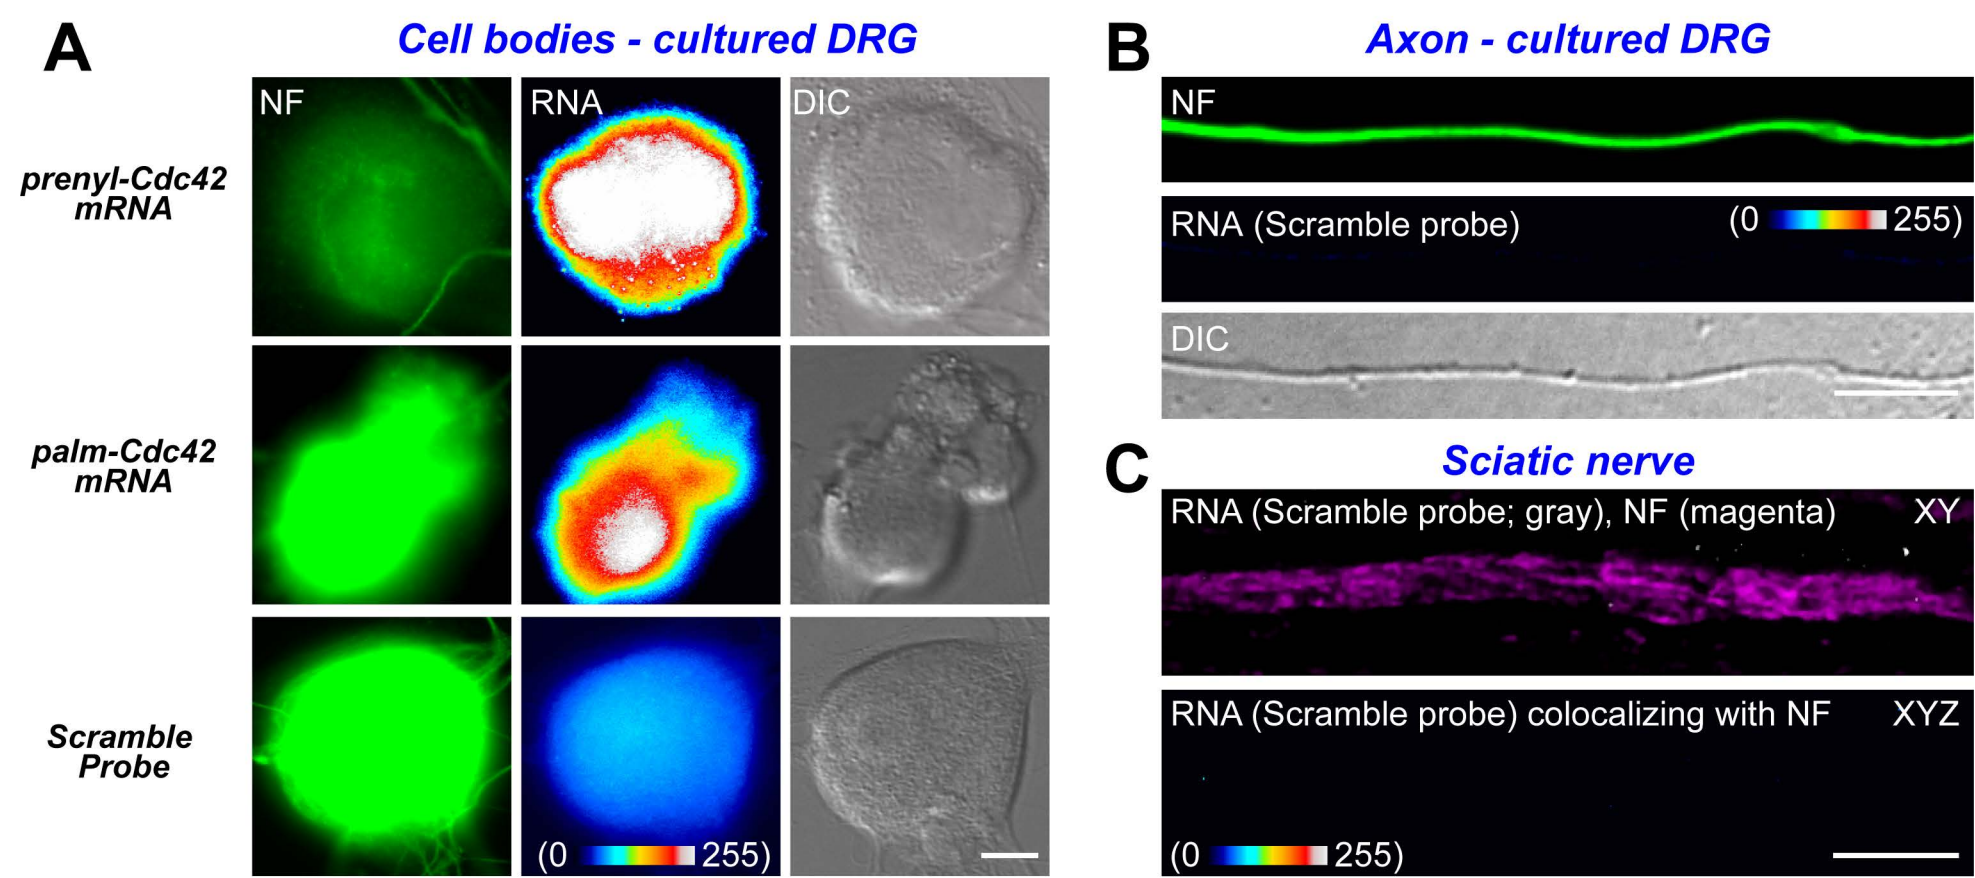

**Figure S1:** *Prenyl-Cdc42 mRNA is localizes to axonal processes.*

**A,** Representative smFISH/IF images for cell bodies of DRG cultures from experiment in Figure 1D [scale bare = 10 μm].

**B,** Representative smFISH/IF images for scrambled RNA smFISH probe for axons of cultured DRGs in Figure 1D [scale bar = 10 μm].

**C,** Representative smFISH/IF images for scrambled RNA smFISH probe for sciatic nerve from experiment shown in Figure 1G [Scale bar = 10 μm].

Supplemental Figure S2

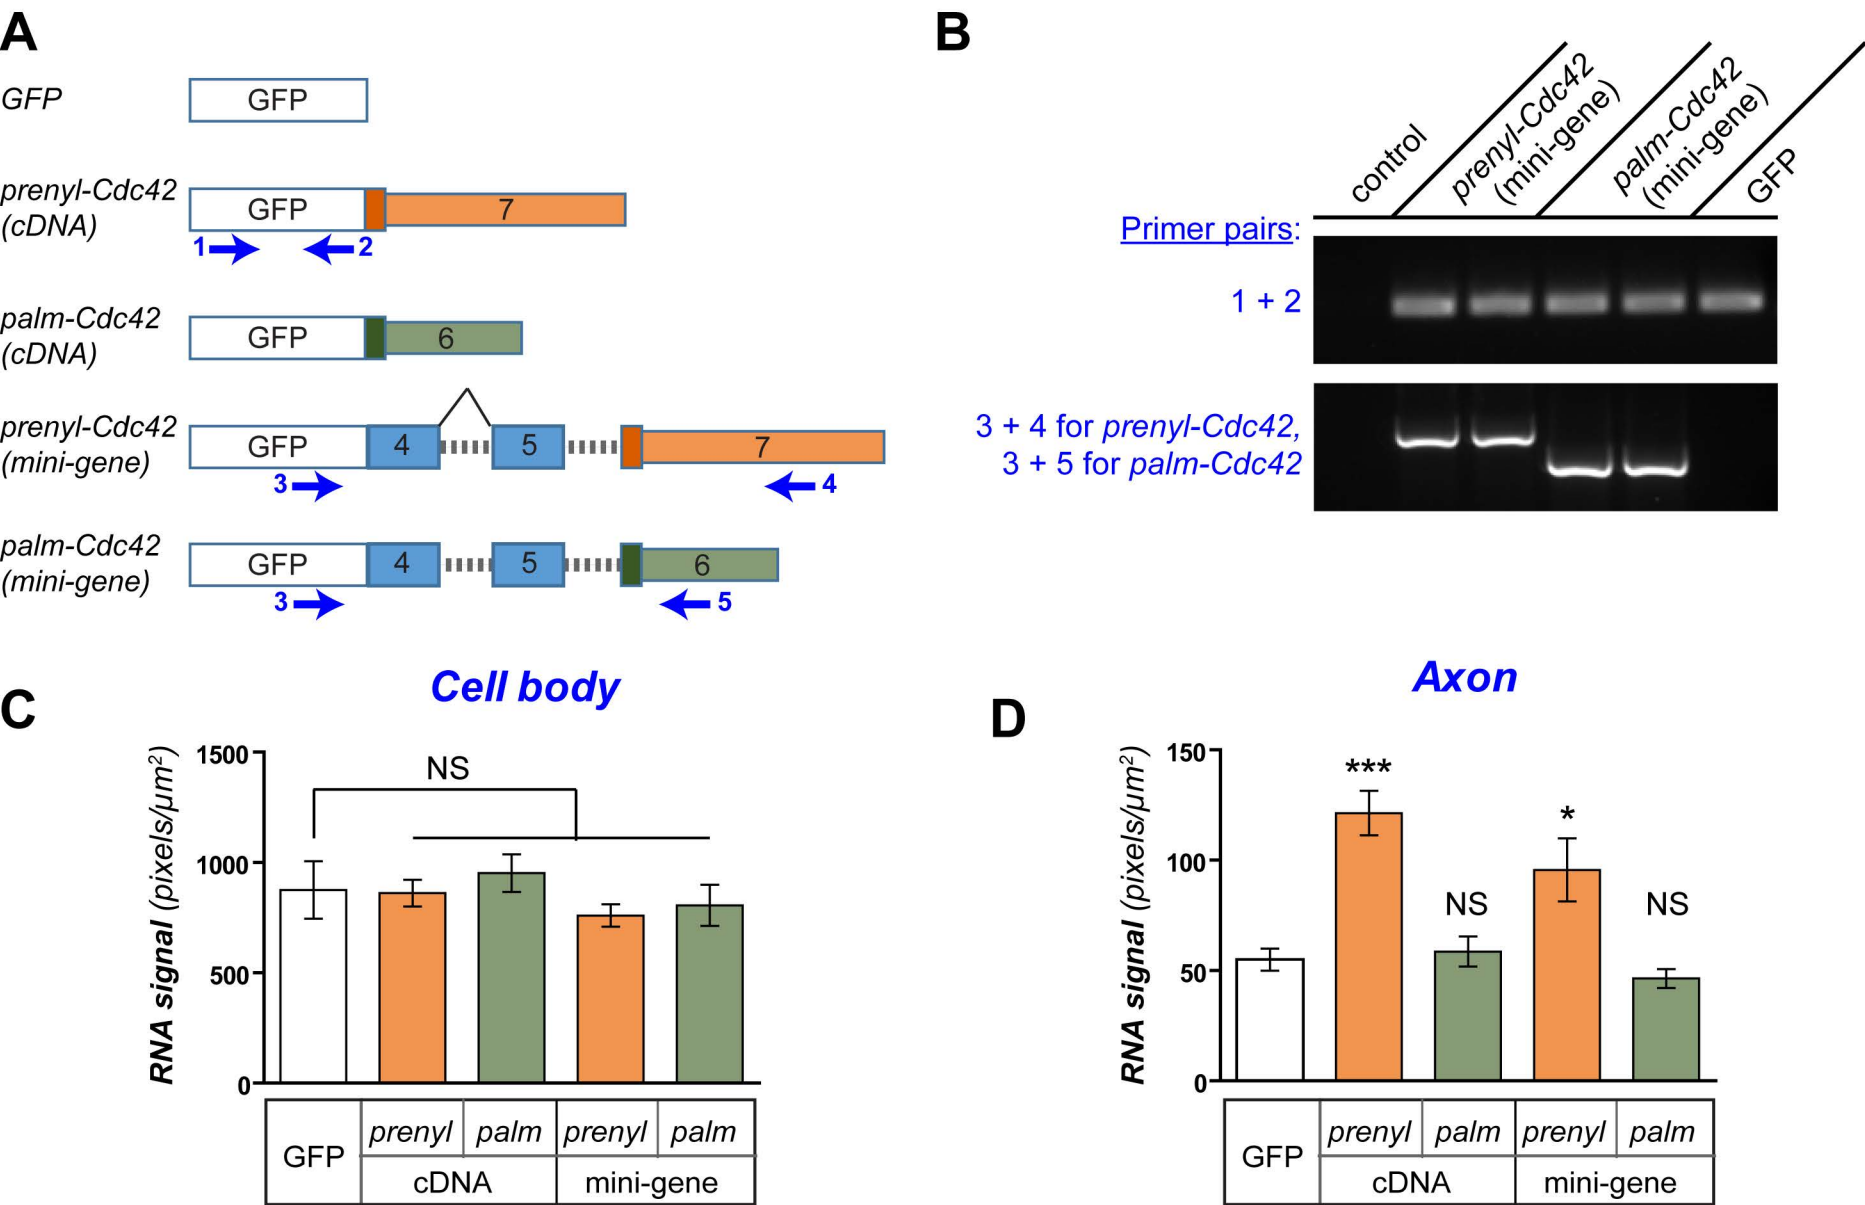

**Figure S2: Axonal localization of *prenyl-Cdc42* does not require splicing.**

**A**, Schematics for GFP-*Cdc42* constructs designed to mimic pre-mRNA splicing differences between *prenyl-Cdc42* and *palm-Cdc42* mRNAs ('mini-genes') vs. mature mRNA ('cDNA'). Sites for annealing of primers 1-5 (blue text) are shown below each RNA schematic.

**B**, Representative ethidium-stained agarose gel for RT-PCR to detect splice variants using primers outlined in A as indicated. The two lanes for the *CDC42* mini-genes show replicate transfections. Amplification with primers 1 + 2 shows relatively equivalent expression across the transfections. Amplification with primers 3 + 4 and 3 + 5 shows anticipated splice variants for mini-gene constructs. Control is untransfected DRGs.

**C-D**, Quantification of GFP mRNA signals from smFISH for cell bodies (**C**) and axons (**D**) is shown as mean  $\pm$  SEM. GFP was used as a negative control ( $N \geq 30$  neurons in 3 independent experiments; \*  $p < 0.05$ , \*\*\*  $p < 0.001$  by by Kruskal-Wallis test with multiple comparisons).

### Supplemental Figure S3

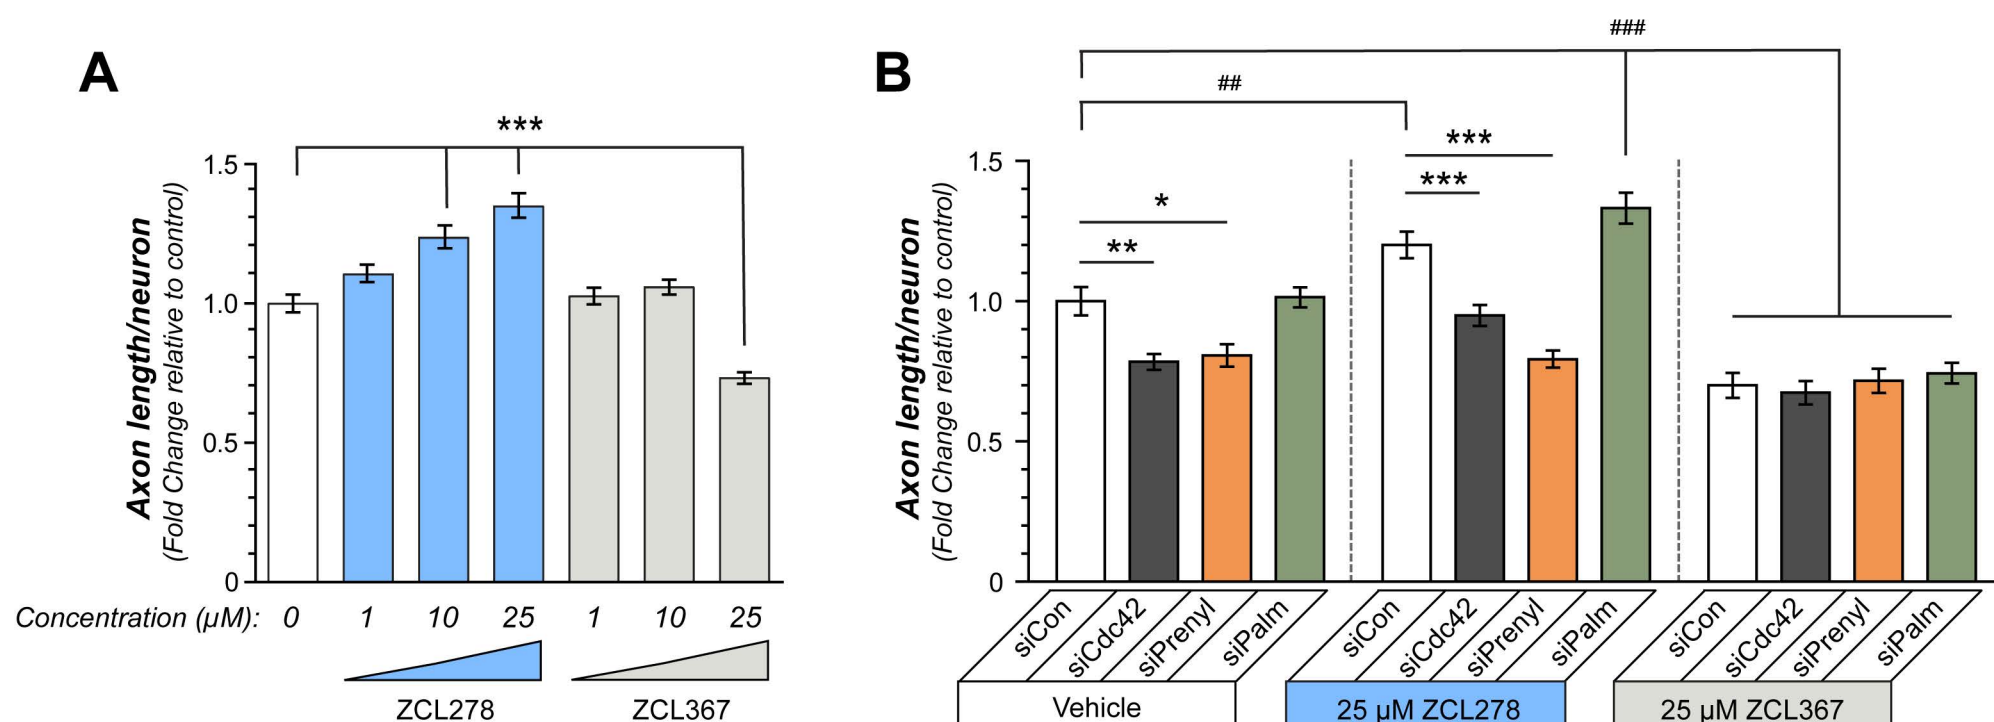

**Figure S3: Axon growth enhancement by prenyl-Cdc42 requires Cdc42 activity.**

**A,** Total axon length per neuron for DRG cultures after 48 hours exposure to ZCL278 and ZCL367 shown as mean  $\pm$  SEM relative to vehicle (control; N  $\geq$  200 neurons in 3 independent experiments; \*\*\* P < 0.005 by one-way ANOVA with pair-wise comparison and Tukey post-hoc tests).

**B**, Total axon length for DRGs transfected with indicated siRNAs and treated with ZCL278 or ZCL367 is shown as mean  $\pm$  SEM relative to siCon + vehicle (N  $\geq$  150 neurons in three independent experiments; \* p < 0.05, \*\* p < 0.01, and \*\*\* p < 0.005 for comparison to siCon within vehicle, ZCL278, and ZCL367 groups and # p < 0.05, ## p < 0.01, ### p < 0.005 group-wise comparisons of ZCL278 or ZCL367 groups to vehicle group for each corresponding siRNAs by Kruskal-Wallis test with multiple comparisons; ZCL367 + pan-siCdc42, siPrenyl or siPalm are not significantly different than ZCL367 plus siCon).

Supplemental Figure S4

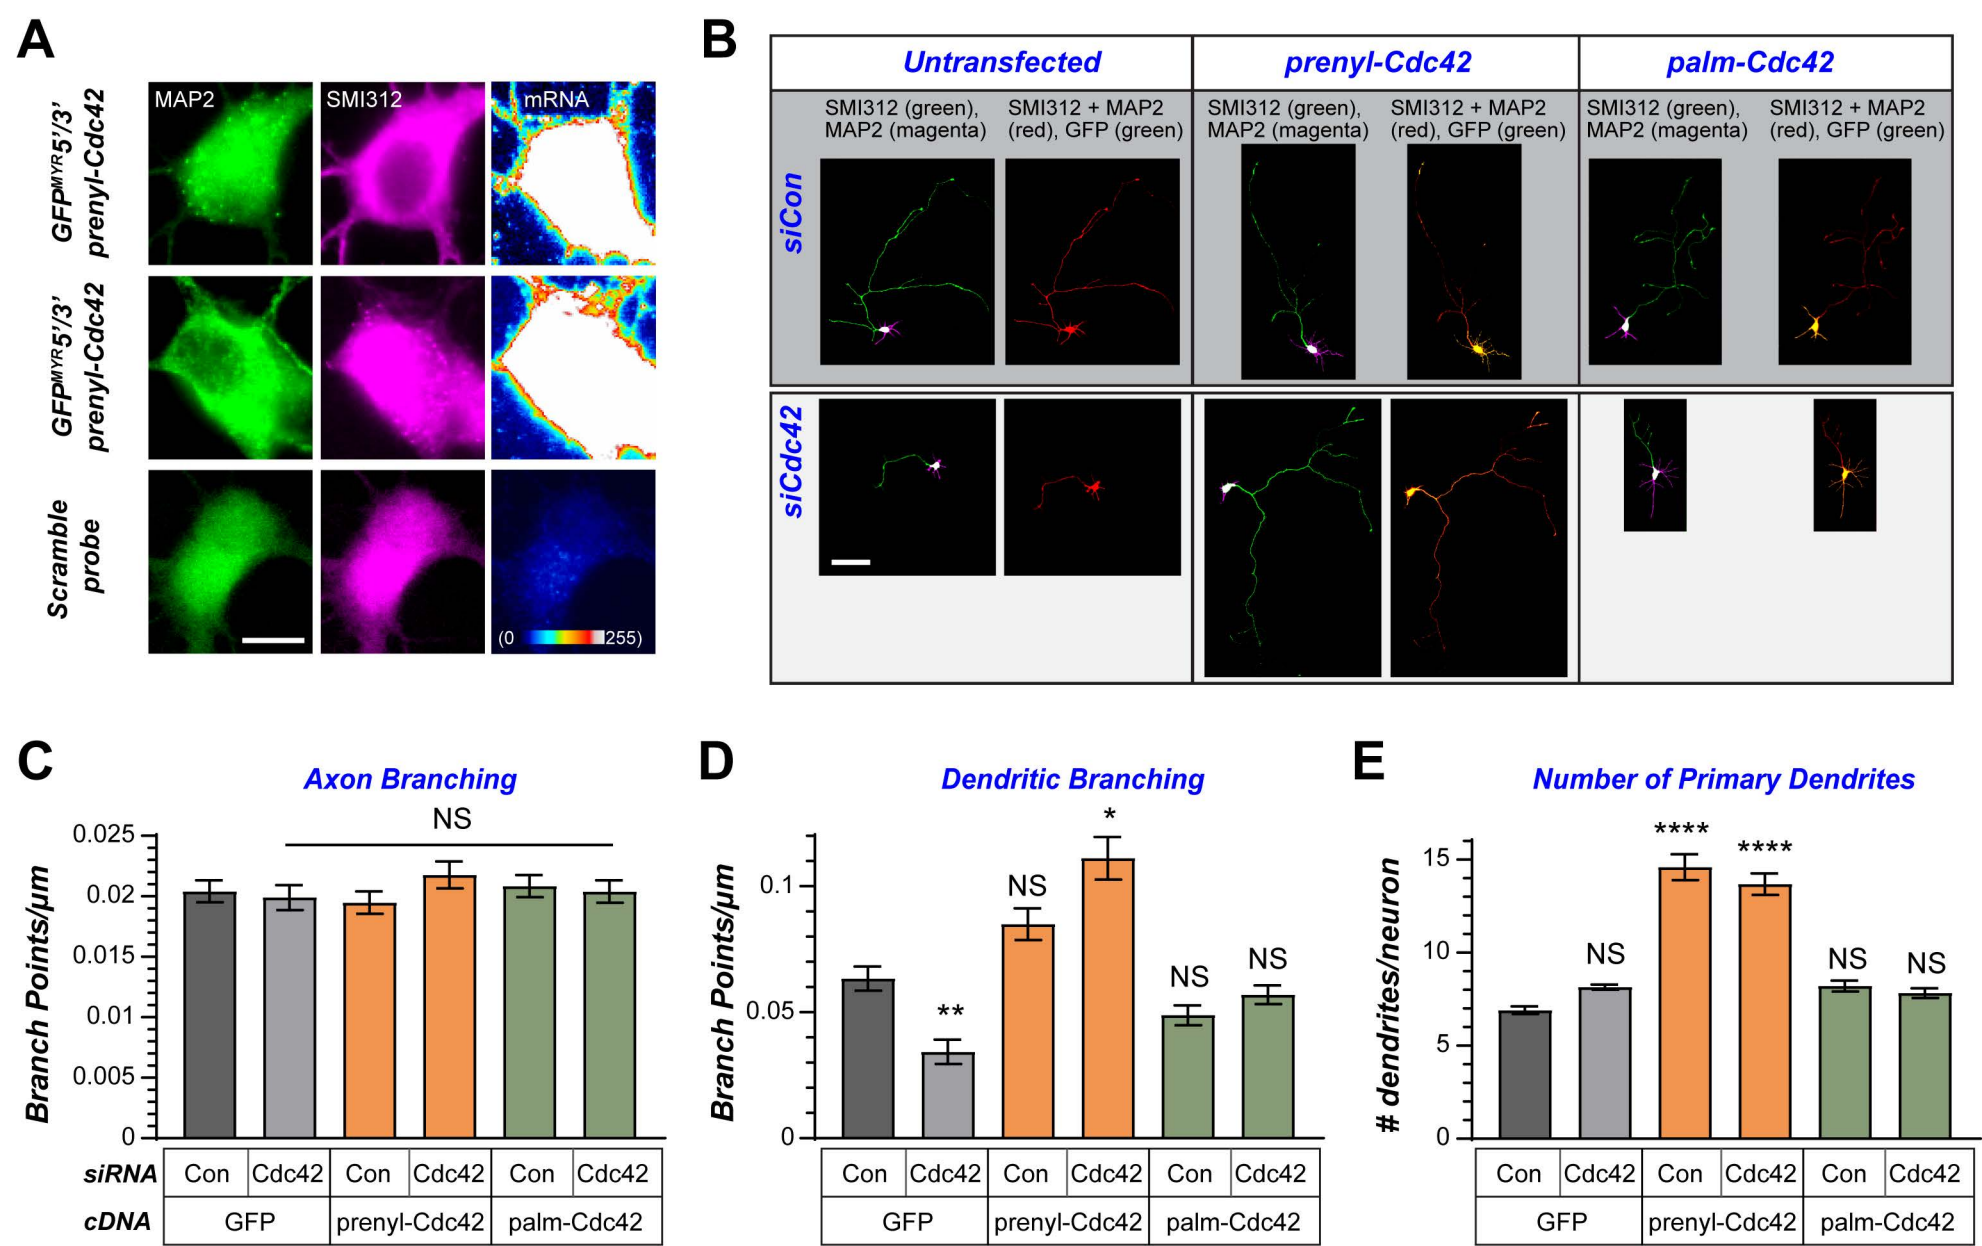

**Figure S4: Differential localization and functions for Cdc42 mRNA isoforms in polarized cortical neurons.**

**A**, Representative smFISH/IF images for cell bodies of cortical neurons corresponding to the axon and dendrite images from Figure 5A are shown [scale bar = 20  $\mu$ m].

**B**, Representative IF images for DIV9 cortical neurons co-transfected with cotransfected with control or pan-Cdc42 siRNAs plus GFP, GFP-prenyl-Cdc42, or GFP-palm-Cdc42 mRNAs is shown as Figure 5E-F [Scale bar = 100  $\mu$ m].

**C-E**, Quantification of axon branching (**C**), dendrite branching (**D**), and number of primary dendrites per neuronal soma (**E**) is shown for neurons co-transfected as in Figure 5E-F ( $n \geq 100$  neurons in 3 independent transfections: \*  $p \leq 0.05$ , \*\* $p \leq 0.01$ , \*\*\*\*  $p \leq 0.001$  and NS = not significant vs. control siRNA + GFP by Kruskal-Wallis test with multiple comparisons).
